# Supplementary material for: Tumor suppressor MCPH1 regulates gene expression profiles related to malignant conversion and chromosomal assembly
Source: PubMed Central journal article supplement — Int J Cancer. 2019 Mar 21;145(8):2070–81. doi: 10.1002/ijc.32234 (PMC6767439; doi:10.1002/ijc.32234), 2019-03-21
Supplement: IJC-145-2070-s001.pdf [file IJC-145-2070-s001.pdf]

Tervasmäki et al.

Supporting Information Figures S1–S5

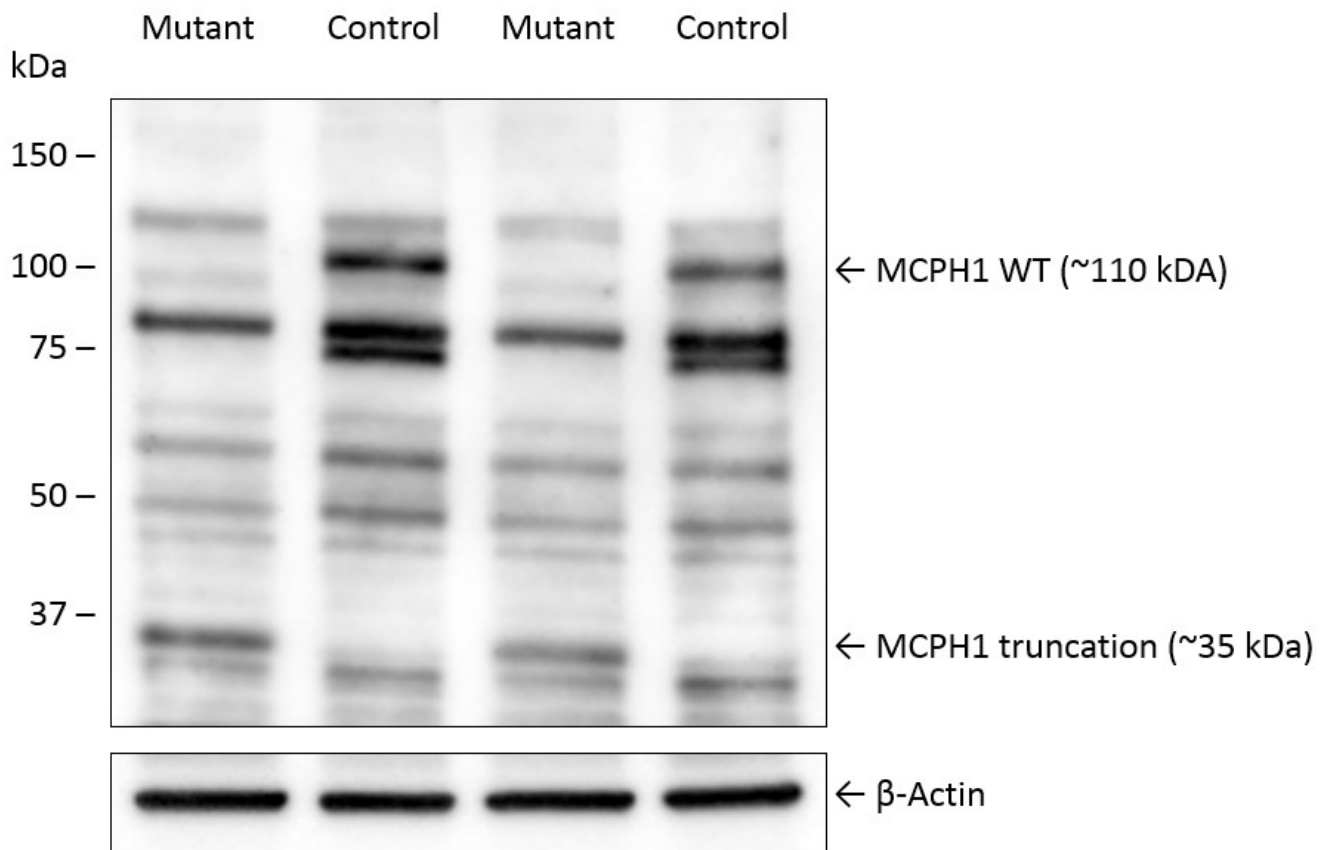

**Fig. S1. Immunoblot of CRISPR/Cas9-edited *MCPH1* mutant and control MCF10A cell lines.** Mutant cell line shows absence of wild type (~110 kDa) and presence of truncated (~35 kDa) *MCPH1* protein.

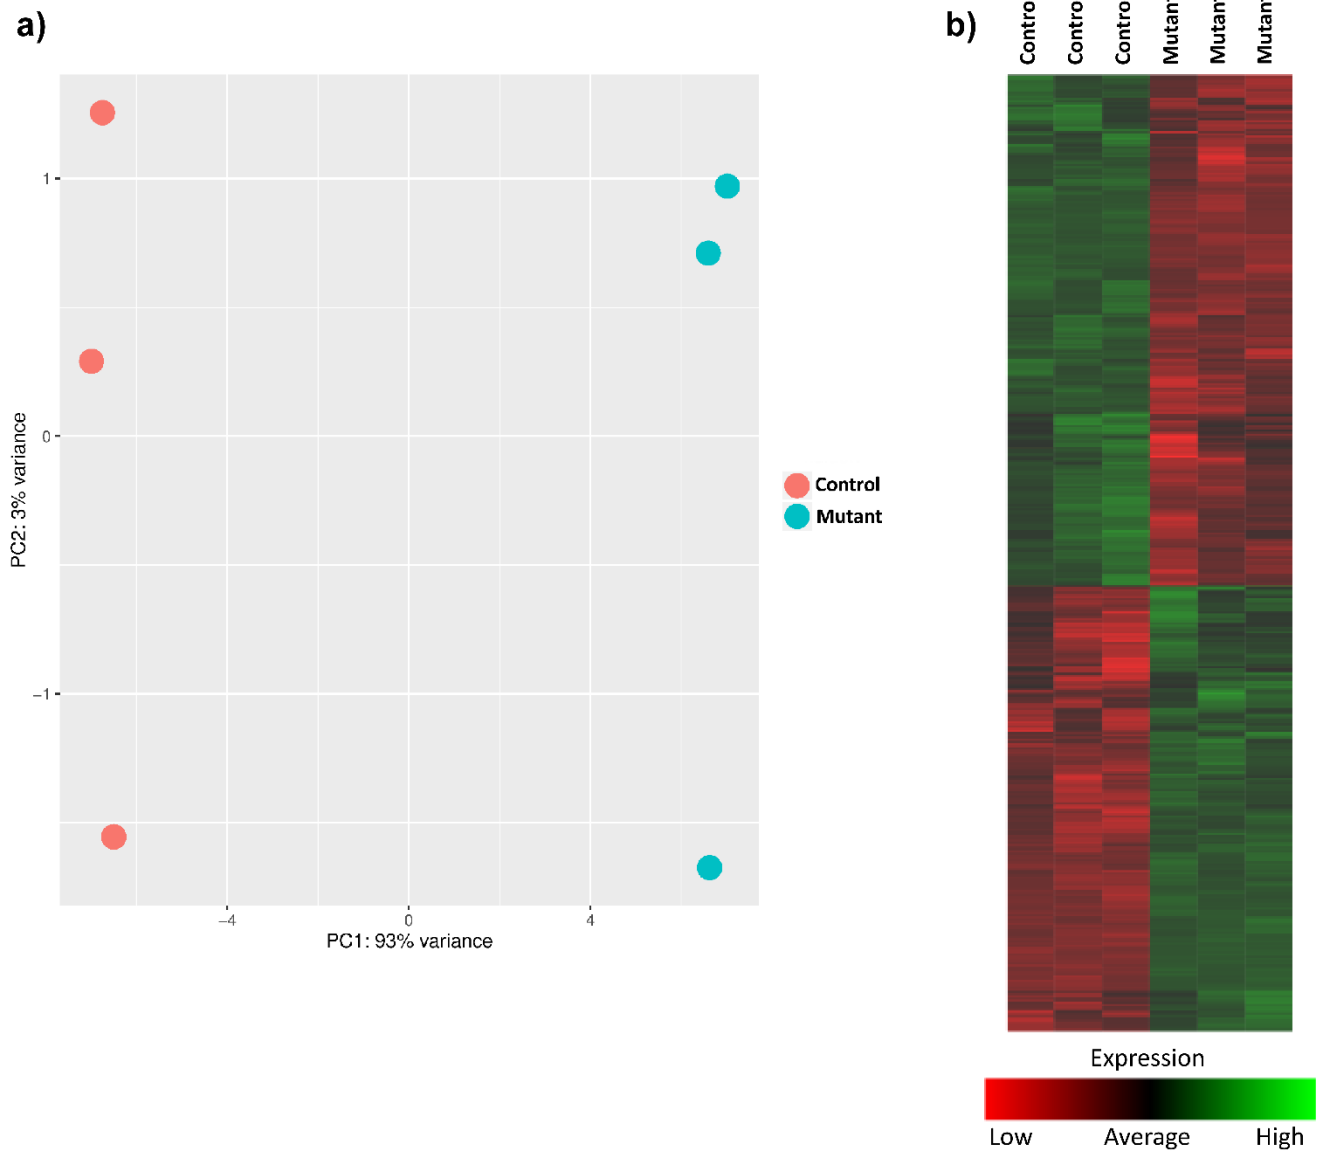

**Fig. S2. *MCPH1* mutant and control cells have distinct gene expression profiles.** **a)** Principal component analysis (PCA) shows gene expression patterns of *MCPH1* mutant and control cell lines being distinct from each other, principal component 1 explaining 93% of the variation between the samples. **b)** Differential gene expression patterns presented as a heatmap based on DESeq2 results. Red indicates decreased gene expression and green increased expression.

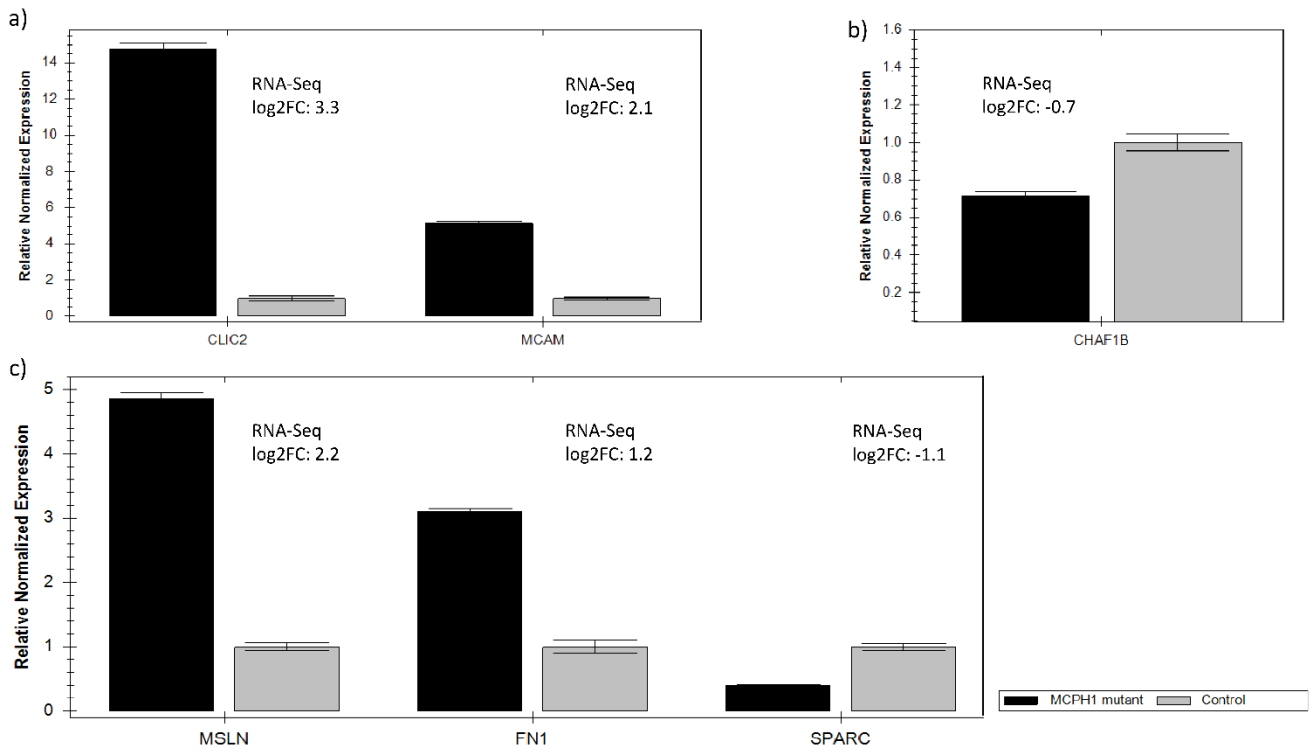

**Fig. S3. Six of the differentially expressed genes in RNA-Seq were analyzed with RT-PCR. a) *CLIC2* and *MCAM*, b) *CHAF1B* and c) *MSLN*, *FN1* and *SPARC*. All analyzed genes showed similar differential expression in the cell lines with both methods. Results are mean ( $\pm$ SE) expression of 3 replicates.**

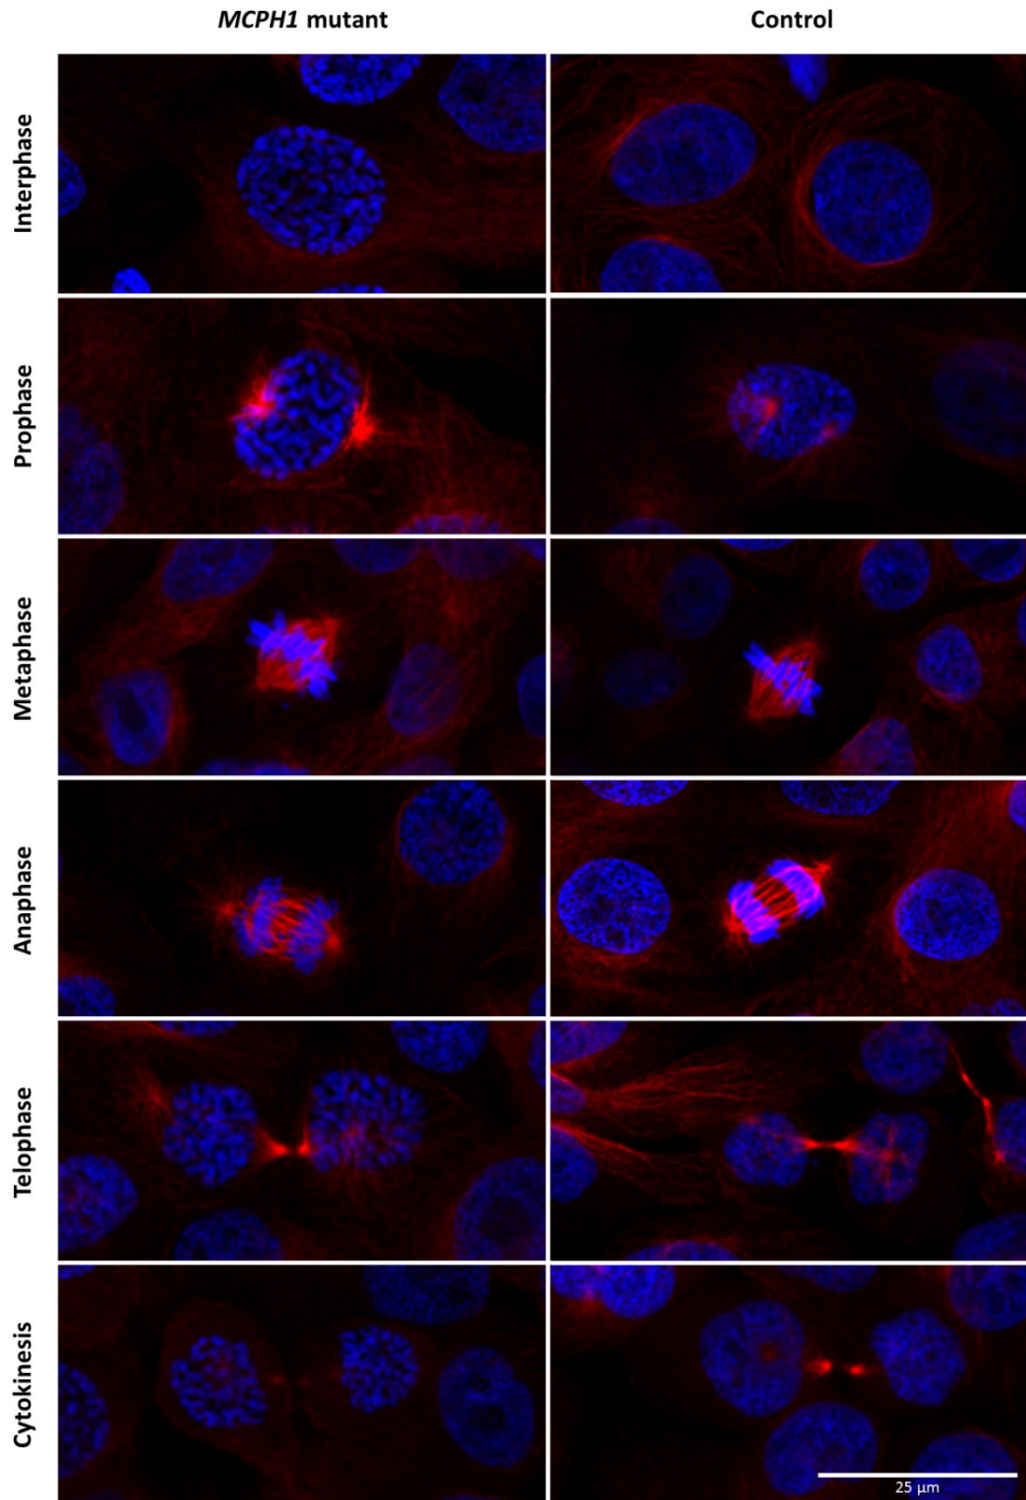

**Fig. S4. Representative images of mitotic phases of *MCPH1* mutated and control MCF10 cells.** Mutant cells show PCC phenotype and prolonged chromatin condensation during telophase and cytokinesis. Fixed cells were stained with DAPI (blue) and anti-tubulin (red). Scale bar 25  $\mu$ m.

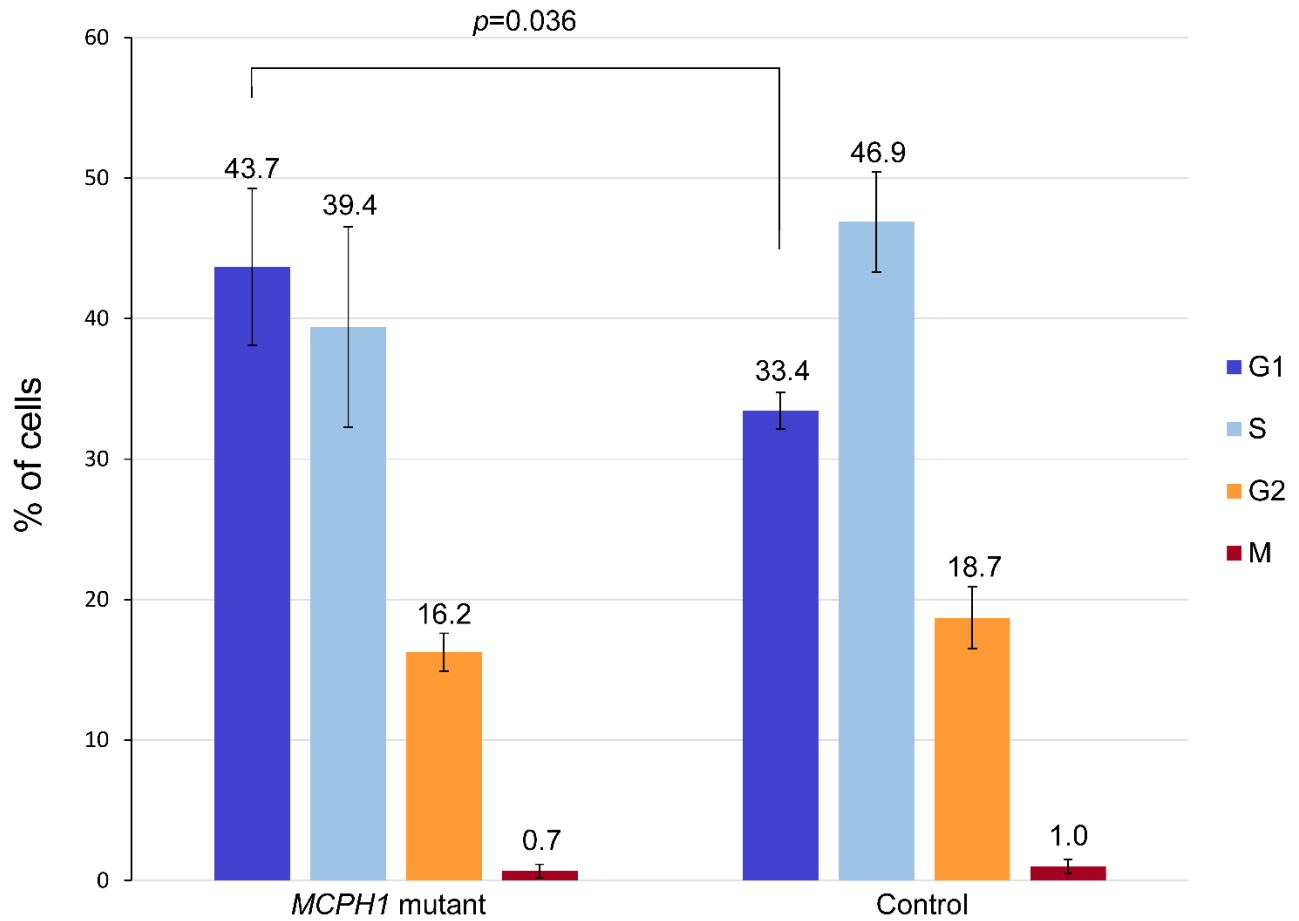

**Fig. S5. *MCPH1* mutant cells have larger proportion of G1 phase cells.** Cell cycle distribution analysis by flow cytometry shows *MCPH1* mutant cell line having more cells in G1 phase (43.7%) than controls (33.4%),  $p=0.036$ . Means of three independent experiments ( $\pm$ SD), Student's t-test.
