# Supplementary material for: Tumor suppressor MCPH1 regulates gene expression profiles related to malignant conversion and chromosomal assembly
Source: PubMed Central journal article supplement — Int J Cancer. 2019 Mar 21;145(8):2070–81. doi: 10.1002/ijc.32234 (PMC6767439; doi:10.1002/ijc.32234), 2019-03-21
Supplement: IJC-145-2070-s002.pdf [file IJC-145-2070-s002.pdf]

Tervasmäki et al.

Supporting Information Tables S1-S4

**Table S1.** RT-PCR primers used for confirming differentially expressed genes in RNA-Seq

| <b>Gene</b>            | <b>Forward primer 5'3'</b> | <b>Reverse primer 5'3'</b> | <b>Amplicon size</b> |
|------------------------|----------------------------|----------------------------|----------------------|
| <i>CHAF1B</i>          | TCTCCGTAGACTGAGTTTCACT     | TCACCAGATTCCACACATCCA      | 73 bp                |
| <i>CLIC2</i>           | AGAACAAACCCTGGCTCCTC       | GCCCACATCAAAAGACTCCT       | 71 bp                |
| <i>FN1</i>             | TTGTACTIONGCTGGGAGAAG      | CTTGTGTCCTGATCGTTGCA       | 75 bp                |
| <i>MCAM</i>            | AAGTCACCGTCCCTGTTTTTC      | CTTCCTTCAGCATTCCCACG       | 75 bp                |
| <i>MSLN</i>            | CCCATTGGACCTGCTGCTAT       | GAGAAGAAACGGGTGCAGG        | 72 bp                |
| <i>SPARC</i>           | CTGGACCAGCACCCCAT          | CATGGGGATGAGGGGAGC         | 75 bp                |
| <b>Reference genes</b> |                            |                            |                      |
| <i>CLK2</i>            | ATGTGGGATTCACCTCTTC        | GGACCCAAGATCCTTTCCAT       | 73bp                 |
| <i>GUSB</i>            | ACGGTGTCAACAAGCATGAG       | ACCAAGCCAGCGAAGCAG         | 95bp                 |

**Table S2.** Differentially expressed genes (log2 fold change >0.5 or <-0.5) between the *MCPH1* mutant and control cell lines in the RNA-Seq, analyzed with DESeq2

| Overexpressed in <i>MCPH1</i> mutant cells |                 |                  | Underexpressed in <i>MCPH1</i> mutant cells |        |                  |         |           |
|--------------------------------------------|-----------------|------------------|---------------------------------------------|--------|------------------|---------|-----------|
| Gene ID                                    | Log2FC          | Adj. p-value (q) | Gene ID                                     | Log2FC | Adj. p-value (q) |         |           |
| 1                                          | <i>CLIC2</i>    | 3.2873           | 3.36E-142                                   | 1      | <i>COCH</i>      | -3.1402 | 3.73E-146 |
| 2                                          | <i>SLC27A6</i>  | 2.8925           | 1.62E-101                                   | 2      | <i>NLGN4X</i>    | -2.9055 | 5.17E-83  |
| 3                                          | <i>GLDC</i>     | 2.4649           | 1.31E-148                                   | 3      | <i>KIF7</i>      | -1.9543 | 3.00E-37  |
| 4                                          | <i>MSLN</i>     | 2.1765           | 3.35E-177                                   | 4      | <i>ABCA3</i>     | -1.9049 | 3.48E-40  |
| 5                                          | <i>FRMD3</i>    | 2.0816           | 7.98E-54                                    | 5      | <i>AIF1L</i>     | -1.5855 | 4.15E-48  |
| 6                                          | <i>MCAM</i>     | 2.0702           | 3.01E-67                                    | 6      | <i>HIST1H2BE</i> | -1.4251 | 1.64E-46  |
| 7                                          | <i>EYA2</i>     | 2.0659           | 1.80E-42                                    | 7      | <i>DENND2D</i>   | -1.3879 | 3.65E-23  |
| 8                                          | <i>DCN</i>      | 1.9832           | 4.44E-99                                    | 8      | <i>CHSY3</i>     | -1.3457 | 1.79E-35  |
| 9                                          | <i>MFAP5</i>    | 1.9279           | 2.62E-44                                    | 9      | <i>MCPH1</i>     | -1.2910 | 2.38E-52  |
| 10                                         | <i>LCP1</i>     | 1.8971           | 8.07E-38                                    | 10     | <i>HIST1H2BB</i> | -1.2627 | 2.11E-74  |
| 11                                         | <i>SPRR2D</i>   | 1.7681           | 1.93E-39                                    | 11     | <i>TSPAN18</i>   | -1.1667 | 3.14E-14  |
| 12                                         | <i>IGFBP3</i>   | 1.6686           | 1.31E-48                                    | 12     | <i>GNAZ</i>      | -1.1469 | 1.07E-12  |
| 13                                         | <i>ERICH5</i>   | 1.6547           | 5.47E-27                                    | 13     | <i>SPARC</i>     | -1.1428 | 6.87E-39  |
| 14                                         | <i>DOCK10</i>   | 1.6489           | 3.62E-33                                    | 14     | <i>NIPAL4</i>    | -1.1260 | 3.59E-12  |
| 15                                         | <i>AZGP1</i>    | 1.6444           | 4.93E-32                                    | 15     | <i>CDH4</i>      | -1.1145 | 1.49E-17  |
| 16                                         | <i>IVL</i>      | 1.6219           | 1.07E-39                                    | 16     | <i>AKR1C2</i>    | -1.0661 | 2.31E-70  |
| 17                                         | <i>SPRR1B</i>   | 1.5572           | 2.80E-52                                    | 17     | <i>SEMA3B</i>    | -1.0356 | 4.67E-12  |
| 18                                         | <i>ZNF732</i>   | 1.5547           | 2.18E-23                                    | 18     | <i>AP1M2</i>     | -1.0319 | 9.01E-43  |
| 19                                         | <i>OVOL1</i>    | 1.5015           | 3.16E-23                                    | 19     | <i>ANXA6</i>     | -1.0148 | 8.30E-27  |
| 20                                         | <i>ABCC2</i>    | 1.4893           | 9.47E-88                                    | 20     | <i>AP1S2</i>     | -1.0003 | 2.13E-22  |
| 21                                         | <i>CFB</i>      | 1.4753           | 5.77E-54                                    | 21     | <i>KRT83</i>     | -0.9556 | 5.16E-10  |
| 22                                         | <i>STEAP4</i>   | 1.4607           | 4.79E-22                                    | 22     | <i>KRT13</i>     | -0.9431 | 2.56E-10  |
| 23                                         | <i>PI3</i>      | 1.4565           | 2.88E-48                                    | 23     | <i>RAB31</i>     | -0.9051 | 1.14E-11  |
| 24                                         | <i>GJA5</i>     | 1.4564           | 1.13E-29                                    | 24     | <i>DLX1</i>      | -0.8921 | 6.64E-08  |
| 25                                         | <i>TNC</i>      | 1.4180           | 5.43E-65                                    | 25     | <i>PLA2G16</i>   | -0.8885 | 4.94E-09  |
| 26                                         | <i>SAA2</i>     | 1.4124           | 2.79E-33                                    | 26     | <i>CRIP2</i>     | -0.8846 | 1.04E-19  |
| 27                                         | <i>CFH</i>      | 1.4122           | 1.69E-84                                    | 27     | <i>SAMD5</i>     | -0.8687 | 5.39E-18  |
| 28                                         | <i>HLA-B</i>    | 1.3926           | 2.90E-79                                    | 28     | <i>RPP25</i>     | -0.8578 | 1.10E-08  |
| 29                                         | <i>ELF3</i>     | 1.3372           | 7.43E-30                                    | 29     | <i>UCHL1</i>     | -0.8206 | 9.03E-07  |
| 30                                         | <i>DPYSL3</i>   | 1.3001           | 4.49E-63                                    | 30     | <i>TREX1</i>     | -0.8136 | 3.30E-09  |
| 31                                         | <i>LPAR3</i>    | 1.2708           | 7.42E-16                                    | 31     | <i>LAPTM5</i>    | -0.8092 | 4.78E-08  |
| 32                                         | <i>C1orf233</i> | 1.2621           | 1.64E-35                                    | 32     | <i>GPAT3</i>     | -0.7938 | 7.02E-07  |
| 33                                         | <i>C15orf48</i> | 1.2615           | 7.22E-17                                    | 33     | <i>HIST1H3F</i>  | -0.7920 | 3.54E-40  |
| 34                                         | <i>IL1B</i>     | 1.2239           | 7.12E-75                                    | 34     | <i>IVD</i>       | -0.7774 | 3.01E-16  |
| 35                                         | <i>UBE2L6</i>   | 1.2172           | 4.86E-27                                    | 35     | <i>ADD2</i>      | -0.7718 | 2.02E-12  |
| 36                                         | <i>C1S</i>      | 1.2111           | 4.09E-14                                    | 36     | <i>IGFBP2</i>    | -0.7508 | 6.18E-08  |
| 37                                         | <i>IQGAP2</i>   | 1.1818           | 5.97E-18                                    | 37     | <i>ZNF85</i>     | -0.7506 | 6.03E-06  |

|    |                   |        |          |
|----|-------------------|--------|----------|
| 38 | <i>LINC00460</i>  | 1.1750 | 2.95E-17 |
| 39 | <i>KCNK15</i>     | 1.1705 | 2.11E-14 |
| 40 | <i>RARRES1</i>    | 1.1666 | 2.37E-13 |
| 41 | <i>DBNDD1</i>     | 1.1651 | 4.68E-30 |
| 42 | <i>AKT3</i>       | 1.1586 | 8.15E-60 |
| 43 | <i>FN1</i>        | 1.1522 | 6.00E-70 |
| 44 | <i>PADI2</i>      | 1.1503 | 1.33E-13 |
| 45 | <i>C1R</i>        | 1.1331 | 8.99E-17 |
| 46 | <i>CEACAM6</i>    | 1.1091 | 8.54E-12 |
| 47 | <i>CFI</i>        | 1.0942 | 3.51E-25 |
| 48 | <i>CCDC80</i>     | 1.0915 | 1.57E-53 |
| 49 | <i>TRIM22</i>     | 1.0736 | 8.18E-30 |
| 50 | <i>STRA6</i>      | 1.0707 | 2.63E-23 |
| 51 | <i>IFIT1</i>      | 1.0417 | 3.70E-11 |
| 52 | <i>CCL28</i>      | 1.0251 | 2.71E-19 |
| 53 | <i>CSGALNACT1</i> | 1.0048 | 1.53E-25 |
| 54 | <i>CLCA2</i>      | 0.9923 | 1.26E-68 |
| 55 | <i>SAA1</i>       | 0.9923 | 2.68E-47 |
| 56 | <i>SYTL2</i>      | 0.9738 | 1.64E-11 |
| 57 | <i>KRT15</i>      | 0.9698 | 3.01E-34 |
| 58 | <i>S100A8</i>     | 0.9679 | 1.10E-22 |
| 59 | <i>ACSL5</i>      | 0.9679 | 4.67E-09 |
| 60 | <i>HES2</i>       | 0.9678 | 6.90E-39 |
| 61 | <i>FBXO32</i>     | 0.9647 | 3.01E-13 |
| 62 | <i>TACC2</i>      | 0.9627 | 4.17E-27 |
| 63 | <i>MAFB</i>       | 0.9577 | 7.66E-16 |
| 64 | <i>SERPINA1</i>   | 0.9495 | 1.52E-22 |
| 65 | <i>SERPINB13</i>  | 0.9470 | 7.72E-14 |
| 66 | <i>CDA</i>        | 0.9397 | 1.45E-08 |
| 67 | <i>CCND2</i>      | 0.9379 | 3.69E-50 |
| 68 | <i>ADAMTSL4</i>   | 0.9361 | 2.98E-12 |
| 69 | <i>CLDN4</i>      | 0.9262 | 7.38E-09 |
| 70 | <i>FAP</i>        | 0.9077 | 2.52E-34 |
| 71 | <i>METRNL</i>     | 0.8990 | 1.84E-11 |
| 72 | <i>PRR15L</i>     | 0.8959 | 2.49E-12 |
| 73 | <i>FYN</i>        | 0.8890 | 6.04E-08 |
| 74 | <i>S100A7</i>     | 0.8886 | 2.79E-08 |
| 75 | <i>SERPINB7</i>   | 0.8814 | 3.66E-09 |
| 76 | <i>KRT16</i>      | 0.8793 | 6.23E-40 |
| 77 | <i>TNNT1</i>      | 0.8761 | 4.34E-09 |
| 78 | <i>PNRC1</i>      | 0.8748 | 2.57E-38 |
| 79 | <i>FBXO2</i>      | 0.8713 | 6.78E-13 |
| 80 | <i>PCDHAC1</i>    | 0.8678 | 2.84E-09 |

|    |                  |         |          |
|----|------------------|---------|----------|
| 38 | <i>BCAM</i>      | -0.7412 | 1.38E-05 |
| 39 | <i>HIST2H3D</i>  | -0.7365 | 2.46E-20 |
| 40 | <i>HIST1H1A</i>  | -0.7338 | 4.29E-23 |
| 41 | <i>PTGS1</i>     | -0.7303 | 3.05E-09 |
| 42 | <i>HIST1H4B</i>  | -0.7292 | 1.93E-47 |
| 43 | <i>SYN3</i>      | -0.7220 | 3.46E-07 |
| 44 | <i>HIST1H3B</i>  | -0.7186 | 5.56E-33 |
| 45 | <i>HIST3H2BB</i> | -0.7107 | 1.12E-27 |
| 46 | <i>IL17RE</i>    | -0.7089 | 1.40E-05 |
| 47 | <i>HIST1H1D</i>  | -0.7088 | 9.01E-30 |
| 48 | <i>HIST1H3J</i>  | -0.7085 | 1.70E-32 |
| 49 | <i>HIST1H2BJ</i> | -0.7050 | 4.54E-49 |
| 50 | <i>MACROD1</i>   | -0.7039 | 2.09E-06 |
| 51 | <i>HIST1H3C</i>  | -0.6990 | 9.05E-45 |
| 52 | <i>HIST1H4K</i>  | -0.6978 | 1.28E-14 |
| 53 | <i>ETNK2</i>     | -0.6948 | 1.09E-14 |
| 54 | <i>HIST1H4C</i>  | -0.6925 | 3.62E-32 |
| 55 | <i>HIST1H3H</i>  | -0.6920 | 3.25E-30 |
| 56 | <i>COL16A1</i>   | -0.6898 | 2.21E-08 |
| 57 | <i>DLL3</i>      | -0.6829 | 7.68E-05 |
| 58 | <i>SCARA3</i>    | -0.6801 | 8.67E-09 |
| 59 | <i>CHAF1B</i>    | -0.6723 | 1.22E-19 |
| 60 | <i>FUOM</i>      | -0.6627 | 8.52E-07 |
| 61 | <i>HIST1H2AB</i> | -0.6412 | 2.78E-24 |
| 62 | <i>HIST1H2AE</i> | -0.6409 | 1.24E-38 |
| 63 | <i>HIST1H2BH</i> | -0.6356 | 9.17E-29 |
| 64 | <i>HIST1H4H</i>  | -0.6284 | 9.38E-32 |
| 65 | <i>SULT1E1</i>   | -0.6213 | 3.60E-10 |
| 66 | <i>PRICKLE1</i>  | -0.6204 | 2.13E-05 |
| 67 | <i>RAMP1</i>     | -0.6176 | 2.15E-04 |
| 68 | <i>GLS2</i>      | -0.6157 | 9.73E-07 |
| 69 | <i>FKBP1B</i>    | -0.6090 | 5.13E-04 |
| 70 | <i>ZNF468</i>    | -0.6086 | 1.41E-07 |
| 71 | <i>MALL</i>      | -0.6041 | 8.29E-10 |
| 72 | <i>HPDL</i>      | -0.6038 | 4.62E-06 |
| 73 | <i>HIST1H2AH</i> | -0.6036 | 7.20E-36 |
| 74 | <i>FGFR2</i>     | -0.6009 | 6.39E-05 |
| 75 | <i>LONRF3</i>    | -0.5989 | 6.01E-04 |
| 76 | <i>PEG10</i>     | -0.5965 | 2.27E-14 |
| 77 | <i>HIST3H2A</i>  | -0.5938 | 1.13E-18 |
| 78 | <i>HIST1H2BL</i> | -0.5891 | 4.42E-23 |
| 79 | <i>EPHB2</i>     | -0.5863 | 1.68E-10 |
| 80 | <i>HIST1H2BG</i> | -0.5858 | 8.93E-24 |

|     |                  |        |          |
|-----|------------------|--------|----------|
| 81  | <i>ICAM1</i>     | 0.8662 | 6.78E-23 |
| 82  | <i>MAPK13</i>    | 0.8656 | 4.87E-21 |
| 83  | <i>ATP6V0A4</i>  | 0.8632 | 3.54E-08 |
| 84  | <i>IGFL1</i>     | 0.8617 | 2.28E-16 |
| 85  | <i>TRIML2</i>    | 0.8552 | 1.93E-13 |
| 86  | <i>LOC155060</i> | 0.8471 | 1.52E-08 |
| 87  | <i>GBP6</i>      | 0.8436 | 1.15E-07 |
| 88  | <i>ATHL1</i>     | 0.8400 | 4.09E-10 |
| 89  | <i>LHFP</i>      | 0.8362 | 2.44E-09 |
| 90  | <i>PUS3</i>      | 0.8312 | 1.01E-13 |
| 91  | <i>CYP1B1</i>    | 0.8310 | 3.52E-29 |
| 92  | <i>GDF15</i>     | 0.8225 | 3.41E-08 |
| 93  | <i>WISP2</i>     | 0.8224 | 5.99E-07 |
| 94  | <i>FRG1CP</i>    | 0.8115 | 3.20E-07 |
| 95  | <i>TCN2</i>      | 0.8078 | 1.69E-06 |
| 96  | <i>TGM2</i>      | 0.8071 | 1.13E-17 |
| 97  | <i>TP53INP1</i>  | 0.7982 | 1.54E-09 |
| 98  | <i>MUC1</i>      | 0.7971 | 9.27E-12 |
| 99  | <i>GBP2</i>      | 0.7957 | 1.27E-24 |
| 100 | <i>CRABP2</i>    | 0.7945 | 7.90E-18 |
| 101 | <i>CRYAB</i>     | 0.7901 | 1.51E-06 |
| 102 | <i>LMO7</i>      | 0.7823 | 4.31E-43 |
| 103 | <i>SPRR1A</i>    | 0.7768 | 3.10E-06 |
| 104 | <i>TSPAN1</i>    | 0.7738 | 2.59E-28 |
| 105 | <i>MACC1</i>     | 0.7729 | 1.62E-12 |
| 106 | <i>LY6D</i>      | 0.7700 | 5.44E-06 |
| 107 | <i>MAGEE1</i>    | 0.7696 | 2.08E-06 |
| 108 | <i>F2R</i>       | 0.7690 | 2.84E-09 |
| 109 | <i>ADGRF1</i>    | 0.7687 | 1.40E-07 |
| 110 | <i>HSPB8</i>     | 0.7670 | 1.40E-08 |
| 111 | <i>FAM127C</i>   | 0.7664 | 6.97E-06 |
| 112 | <i>BTG2</i>      | 0.7620 | 4.69E-16 |
| 113 | <i>CREBRF</i>    | 0.7580 | 1.41E-07 |
| 114 | <i>P3H3</i>      | 0.7553 | 9.10E-06 |
| 115 | <i>PLAC8</i>     | 0.7552 | 3.15E-07 |
| 116 | <i>PDZK1IP1</i>  | 0.7537 | 4.21E-07 |
| 117 | <i>MYEOV</i>     | 0.7532 | 9.24E-06 |
| 118 | <i>IFI44</i>     | 0.7530 | 2.73E-06 |
| 119 | <i>TMC4</i>      | 0.7347 | 6.97E-07 |
| 120 | <i>IFI27</i>     | 0.7334 | 1.97E-05 |
| 121 | <i>SPRR2A</i>    | 0.7302 | 1.69E-05 |
| 122 | <i>SEPT6</i>     | 0.7282 | 1.88E-13 |
| 123 | <i>GRHL3</i>     | 0.7256 | 2.01E-12 |

|     |                     |         |          |
|-----|---------------------|---------|----------|
| 81  | <i>CA9</i>          | -0.5848 | 1.08E-03 |
| 82  | <i>HTRA1</i>        | -0.5825 | 6.59E-23 |
| 83  | <i>IRS1</i>         | -0.5817 | 6.84E-05 |
| 84  | <i>HIST1H3A</i>     | -0.5788 | 9.26E-16 |
| 85  | <i>HIST1H2AL</i>    | -0.5780 | 1.89E-24 |
| 86  | <i>HIST1H4D</i>     | -0.5771 | 3.39E-21 |
| 87  | <i>IGFBP6</i>       | -0.5704 | 9.62E-10 |
| 88  | <i>CLCN2</i>        | -0.5679 | 2.84E-06 |
| 89  | <i>CDC45</i>        | -0.5674 | 1.58E-15 |
| 90  | <i>TSPAN5</i>       | -0.5630 | 3.56E-07 |
| 91  | <i>PHGDH</i>        | -0.5594 | 9.76E-09 |
| 92  | <i>HIST1H3G</i>     | -0.5590 | 2.76E-21 |
| 93  | <i>VWA5A</i>        | -0.5583 | 9.24E-04 |
| 94  | <i>HIST2H2AB</i>    | -0.5554 | 7.18E-19 |
| 95  | <i>TUB</i>          | -0.5508 | 3.56E-08 |
| 96  | <i>HIST2H2BE</i>    | -0.5508 | 7.66E-13 |
| 97  | <i>MT1F</i>         | -0.5482 | 2.22E-03 |
| 98  | <i>RPSAP52</i>      | -0.5456 | 1.74E-06 |
| 99  | <i>WTIP</i>         | -0.5445 | 1.53E-06 |
| 100 | <i>HIST1H2AM</i>    | -0.5422 | 9.82E-26 |
| 101 | <i>EPCAM</i>        | -0.5420 | 6.93E-12 |
| 102 | <i>HIST1H1E</i>     | -0.5409 | 1.53E-25 |
| 103 | <i>ARHGAP23</i>     | -0.5399 | 4.01E-12 |
| 104 | <i>HIST1H4A</i>     | -0.5364 | 2.46E-07 |
| 105 | <i>HIST1H2AI</i>    | -0.5362 | 1.24E-27 |
| 106 | <i>HIST1H2BI</i>    | -0.5355 | 5.89E-27 |
| 107 | <i>PPP2R2C</i>      | -0.5348 | 8.17E-07 |
| 108 | <i>GRK5</i>         | -0.5331 | 1.12E-04 |
| 109 | <i>FAM174B</i>      | -0.5329 | 1.11E-03 |
| 110 | <i>LARGE</i>        | -0.5313 | 3.46E-05 |
| 111 | <i>SYT12</i>        | -0.5267 | 3.69E-04 |
| 112 | <i>HIST1H2AC</i>    | -0.5252 | 4.43E-14 |
| 113 | <i>HIST1H4L</i>     | -0.5227 | 5.86E-12 |
| 114 | <i>HIST1H2BD</i>    | -0.5206 | 2.78E-19 |
| 115 | <i>CHRNA9</i>       | -0.5186 | 1.37E-04 |
| 116 | <i>ESPL1</i>        | -0.5178 | 1.39E-10 |
| 117 | <i>HIST1H3D</i>     | -0.5162 | 1.65E-11 |
| 118 | <i>LRAT</i>         | -0.5136 | 3.31E-06 |
| 119 | <i>LOC100506990</i> | -0.5125 | 3.25E-03 |
| 120 | <i>EREG</i>         | -0.5113 | 2.06E-09 |
| 121 | <i>FAM132B</i>      | -0.5103 | 2.38E-03 |
| 122 | <i>CBR3</i>         | -0.5090 | 1.46E-04 |
| 123 | <i>HERC5</i>        | -0.5079 | 3.69E-04 |

|     |                 |        |          |
|-----|-----------------|--------|----------|
| 124 | <i>TACSTD2</i>  | 0.7210 | 1.21E-44 |
| 125 | <i>SLAMF7</i>   | 0.7208 | 2.28E-05 |
| 126 | <i>RHOV</i>     | 0.7166 | 1.67E-12 |
| 127 | <i>C12orf54</i> | 0.7163 | 2.83E-05 |
| 128 | <i>SULF2</i>    | 0.7159 | 9.54E-13 |
| 129 | <i>CLDN7</i>    | 0.7150 | 1.84E-28 |
| 130 | <i>CPE</i>      | 0.7130 | 1.40E-07 |
| 131 | <i>MARCO</i>    | 0.7117 | 4.04E-07 |
| 132 | <i>FAM198B</i>  | 0.7075 | 1.87E-06 |
| 133 | <i>C1orf115</i> | 0.7053 | 1.05E-07 |
| 134 | <i>HHAT</i>     | 0.7004 | 5.39E-07 |
| 135 | <i>DAPK1</i>    | 0.6982 | 3.02E-06 |
| 136 | <i>PROM2</i>    | 0.6900 | 1.25E-06 |
| 137 | <i>FUT3</i>     | 0.6898 | 2.38E-05 |
| 138 | <i>PLD1</i>     | 0.6875 | 1.73E-08 |
| 139 | <i>VSTM2L</i>   | 0.6854 | 2.58E-10 |
| 140 | <i>MAP3K7CL</i> | 0.6822 | 5.63E-05 |
| 141 | <i>LEF1</i>     | 0.6796 | 8.35E-06 |
| 142 | <i>CDKN1A</i>   | 0.6790 | 1.09E-29 |
| 143 | <i>SLPI</i>     | 0.6782 | 4.19E-23 |
| 144 | <i>KLHL24</i>   | 0.6739 | 2.55E-10 |
| 145 | <i>PCDHAC2</i>  | 0.6678 | 2.64E-05 |
| 146 | <i>LIF</i>      | 0.6671 | 1.08E-10 |
| 147 | <i>PCSK1N</i>   | 0.6666 | 1.01E-05 |
| 148 | <i>S1PR3</i>    | 0.6637 | 6.06E-10 |
| 149 | <i>AQP3</i>     | 0.6636 | 1.57E-09 |
| 150 | <i>MCF2</i>     | 0.6544 | 1.09E-05 |
| 151 | <i>PLCH2</i>    | 0.6501 | 1.17E-08 |
| 152 | <i>SLFN5</i>    | 0.6498 | 5.73E-27 |
| 153 | <i>PVRL4</i>    | 0.6484 | 3.10E-05 |
| 154 | <i>INPP5D</i>   | 0.6475 | 1.16E-13 |
| 155 | <i>CLDN1</i>    | 0.6445 | 7.78E-18 |
| 156 | <i>IL32</i>     | 0.6444 | 1.66E-04 |
| 157 | <i>DYRK1B</i>   | 0.6435 | 2.32E-05 |
| 158 | <i>ARL9</i>     | 0.6433 | 9.59E-06 |
| 159 | <i>TSC22D3</i>  | 0.6424 | 1.62E-10 |
| 160 | <i>IFIT2</i>    | 0.6374 | 1.69E-04 |
| 161 | <i>REEP6</i>    | 0.6313 | 3.06E-04 |
| 162 | <i>TMEM171</i>  | 0.6241 | 4.28E-04 |
| 163 | <i>ADGRL2</i>   | 0.6223 | 2.61E-20 |
| 164 | <i>S100A9</i>   | 0.6202 | 1.60E-22 |
| 165 | <i>SCEL</i>     | 0.6177 | 7.66E-16 |
| 166 | <i>CDKN1C</i>   | 0.6172 | 2.83E-06 |

|     |               |         |          |
|-----|---------------|---------|----------|
| 124 | <i>ASF1B</i>  | -0.5052 | 4.38E-13 |
| 125 | <i>SLC1A4</i> | -0.5017 | 2.82E-04 |

|     |                     |        |          |
|-----|---------------------|--------|----------|
| 167 | <i>NINJ1</i>        | 0.6165 | 5.40E-12 |
| 168 | <i>NFASC</i>        | 0.6165 | 3.85E-04 |
| 169 | <i>IFITM2</i>       | 0.6141 | 1.37E-20 |
| 170 | <i>BBOX1</i>        | 0.6046 | 6.49E-04 |
| 171 | <i>DUSP1</i>        | 0.6043 | 1.48E-28 |
| 172 | <i>IFITM3</i>       | 0.6039 | 3.01E-25 |
| 173 | <i>NEAT1</i>        | 0.6031 | 7.71E-05 |
| 174 | <i>GLMP</i>         | 0.6004 | 2.78E-10 |
| 175 | <i>SDC3</i>         | 0.5997 | 1.02E-11 |
| 176 | <i>IRF9</i>         | 0.5964 | 4.75E-05 |
| 177 | <i>NUPR1</i>        | 0.5940 | 1.90E-10 |
| 178 | <i>DSG3</i>         | 0.5903 | 2.81E-31 |
| 179 | <i>TNFSF10</i>      | 0.5895 | 9.84E-04 |
| 180 | <i>SLC16A4</i>      | 0.5884 | 4.67E-07 |
| 181 | <i>ERC2</i>         | 0.5883 | 1.02E-03 |
| 182 | <i>MAPRE3</i>       | 0.5870 | 1.18E-05 |
| 183 | <i>CGN</i>          | 0.5857 | 2.22E-06 |
| 184 | <i>ZDHHC2</i>       | 0.5845 | 6.47E-09 |
| 185 | <i>SH3PXD2A-AS1</i> | 0.5836 | 1.57E-08 |
| 186 | <i>CMTM7</i>        | 0.5831 | 3.57E-05 |
| 187 | <i>NOTCH1</i>       | 0.5795 | 3.81E-17 |
| 188 | <i>ZDHHC8</i>       | 0.5791 | 7.89E-13 |
| 189 | <i>SLC6A9</i>       | 0.5784 | 3.56E-06 |
| 190 | <i>SERPINB2</i>     | 0.5771 | 1.70E-10 |
| 191 | <i>ABCD1</i>        | 0.5736 | 1.14E-04 |
| 192 | <i>YPEL5</i>        | 0.5734 | 6.45E-13 |
| 193 | <i>GSN</i>          | 0.5731 | 1.93E-13 |
| 194 | <i>TMEM63C</i>      | 0.5728 | 4.39E-05 |
| 195 | <i>CD24</i>         | 0.5713 | 2.78E-29 |
| 196 | <i>EHF</i>          | 0.5708 | 3.43E-09 |
| 197 | <i>ZBTB22</i>       | 0.5687 | 5.61E-05 |
| 198 | <i>BCL6</i>         | 0.5663 | 2.78E-06 |
| 199 | <i>PDP1</i>         | 0.5660 | 1.35E-16 |
| 200 | <i>NCF2</i>         | 0.5622 | 6.31E-04 |
| 201 | <i>GPRC5C</i>       | 0.5611 | 6.69E-06 |
| 202 | <i>MGLL</i>         | 0.5586 | 3.42E-13 |
| 203 | <i>CCDC64B</i>      | 0.5579 | 1.90E-03 |
| 204 | <i>SNORA74A</i>     | 0.5575 | 1.97E-03 |
| 205 | <i>SLC25A18</i>     | 0.5570 | 2.01E-03 |
| 206 | <i>NR1D2</i>        | 0.5554 | 7.49E-06 |
| 207 | <i>ZFP36</i>        | 0.5551 | 5.98E-07 |
| 208 | <i>F8A1</i>         | 0.5533 | 2.23E-03 |

|     |                  |        |          |
|-----|------------------|--------|----------|
| 209 | <i>CD99L2</i>    | 0.5526 | 6.93E-13 |
| 210 | <i>L1CAM</i>     | 0.5496 | 1.85E-07 |
| 211 | <i>CXADR</i>     | 0.5494 | 6.13E-08 |
| 212 | <i>RALGDS</i>    | 0.5489 | 1.09E-08 |
| 213 | <i>STC1</i>      | 0.5487 | 6.00E-04 |
| 214 | <i>PSCA</i>      | 0.5473 | 9.39E-08 |
| 215 | <i>VSNL1</i>     | 0.5471 | 2.02E-06 |
| 216 | <i>BIRC3</i>     | 0.5467 | 1.18E-13 |
| 217 | <i>SPOCD1</i>    | 0.5444 | 1.90E-03 |
| 218 | <i>TYMP</i>      | 0.5425 | 6.34E-08 |
| 219 | <i>ZFP57</i>     | 0.5415 | 2.98E-03 |
| 220 | <i>FOSB</i>      | 0.5399 | 5.12E-04 |
| 221 | <i>TNFRSF10C</i> | 0.5379 | 3.16E-03 |
| 222 | <i>PYGO1</i>     | 0.5365 | 5.40E-05 |
| 223 | <i>SOCS3</i>     | 0.5361 | 1.50E-03 |
| 224 | <i>HLA-F</i>     | 0.5353 | 2.18E-06 |
| 225 | <i>ITGB6</i>     | 0.5353 | 5.75E-24 |
| 226 | <i>FAM214B</i>   | 0.5323 | 9.36E-09 |
| 227 | <i>PBXIP1</i>    | 0.5318 | 1.60E-08 |
| 228 | <i>CALCOCO1</i>  | 0.5314 | 8.72E-08 |
| 229 | <i>MAOA</i>      | 0.5311 | 6.80E-13 |
| 230 | <i>LIPH</i>      | 0.5311 | 3.72E-03 |
| 231 | <i>HSH2D</i>     | 0.5310 | 1.26E-03 |
| 232 | <i>NTN4</i>      | 0.5293 | 4.75E-11 |
| 233 | <i>MEF2D</i>     | 0.5293 | 2.93E-07 |
| 234 | <i>PLEKHH3</i>   | 0.5286 | 1.95E-06 |
| 235 | <i>SIRPB2</i>    | 0.5280 | 2.34E-03 |
| 236 | <i>GAMT</i>      | 0.5233 | 1.51E-03 |
| 237 | <i>ADAM21</i>    | 0.5231 | 2.37E-03 |
| 238 | <i>LMX1B</i>     | 0.5209 | 4.33E-03 |
| 239 | <i>PROS1</i>     | 0.5190 | 6.82E-08 |
| 240 | <i>GPRC5A</i>    | 0.5187 | 8.38E-21 |
| 241 | <i>VNN1</i>      | 0.5187 | 3.74E-03 |
| 242 | <i>GREB1</i>     | 0.5182 | 2.59E-03 |
| 243 | <i>MED24</i>     | 0.5169 | 1.42E-18 |
| 244 | <i>NCKAP5L</i>   | 0.5168 | 1.53E-06 |
| 245 | <i>CYP2J2</i>    | 0.5165 | 4.78E-03 |
| 246 | <i>PIK3CD</i>    | 0.5162 | 1.36E-04 |
| 247 | <i>CSF1R</i>     | 0.5159 | 2.65E-06 |
| 248 | <i>TTC9</i>      | 0.5145 | 5.62E-04 |
| 249 | <i>SERPINI1</i>  | 0.5145 | 4.51E-03 |
| 250 | <i>LAMA3</i>     | 0.5130 | 4.39E-32 |
| 251 | <i>PHLDB3</i>    | 0.5128 | 2.04E-03 |

|     |                 |        |          |
|-----|-----------------|--------|----------|
| 252 | <i>C11orf70</i> | 0.5120 | 3.39E-03 |
| 253 | <i>SEC14L1</i>  | 0.5077 | 9.95E-09 |
| 254 | <i>GRN</i>      | 0.5074 | 5.79E-15 |
| 255 | <i>GDPD3</i>    | 0.5074 | 5.23E-03 |
| 256 | <i>CSF1</i>     | 0.5070 | 1.50E-04 |
| 257 | <i>PML</i>      | 0.5063 | 1.46E-06 |
| 258 | <i>PIK3R3</i>   | 0.5059 | 2.92E-07 |
| 259 | <i>ERBB3</i>    | 0.5049 | 1.42E-05 |
| 260 | <i>MVP</i>      | 0.5044 | 8.21E-18 |
| 261 | <i>CYB5R1</i>   | 0.5042 | 3.93E-14 |
| 262 | <i>LZTS2</i>    | 0.5034 | 5.54E-06 |
| 263 | <i>TMEM63B</i>  | 0.5024 | 1.86E-11 |
| 264 | <i>SLC44A5</i>  | 0.5014 | 2.82E-07 |
| 265 | <i>MYL9</i>     | 0.5009 | 9.38E-05 |
| 266 | <i>MROH6</i>    | 0.5007 | 2.12E-06 |

---

Log2FC: log2 fold change, adj: adjusted.



**Table S3.** The expanded list of molecules enriched in cancer and invasion-related pathways in IPA

| Metastasis |                         |        | Advanced malignant tumor |            |        | Invasion of mammary tumor cells |            |        |
|------------|-------------------------|--------|--------------------------|------------|--------|---------------------------------|------------|--------|
| Molecule   | Prediction <sup>a</sup> | Log2FC | Molecule                 | Prediction | Log2FC | Molecule                        | Prediction | Log2FC |
| MCAM       | Increased               | 2.07   | MSLN                     | Affected   | 2.176  | MCAM                            | Increased  | 2.07   |
| TNC        | Increased               | 1.418  | MCAM                     | Increased  | 2.07   | FN1                             | Increased  | 1.152  |
| DPYSL3     | Decreased               | 1.3    | MFAP5                    | Affected   | 1.928  | S100A8                          | Increased  | 0.968  |
| IL1B       | Increased               | 1.224  | TNC                      | Increased  | 1.418  | S100A7                          | Increased  | 0.889  |
| AKT3       | Increased               | 1.159  | CFH                      | Affected   | 1.412  | F2R                             | Increased  | 0.769  |
| FN1        | Increased               | 1.152  | DPYSL3                   | Decreased  | 1.3    | NOTCH1                          | Increased  | 0.579  |
| C1R        | Affected                | 1.133  | IL1B                     | Increased  | 1.224  | CSF1                            | Increased  | 0.507  |
| CCDC80     | Decreased               | 1.091  | AKT3                     | Increased  | 1.159  |                                 |            |        |
| MAFB       | Affected                | 0.958  | FN1                      | Increased  | 1.152  |                                 |            |        |
| SERPINA1   | Affected                | 0.949  | C1R                      | Affected   | 1.133  |                                 |            |        |
| CCND2      | Affected                | 0.938  | CCDC80                   | Decreased  | 1.091  |                                 |            |        |
| CLDN4      | Affected                | 0.926  | MAFB                     | Affected   | 0.958  |                                 |            |        |
| FYN        | Increased               | 0.889  | SERPINA1                 | Affected   | 0.949  |                                 |            |        |
| ICAM1      | Affected                | 0.866  | CCND2                    | Affected   | 0.938  |                                 |            |        |
| CYP1B1     | Affected                | 0.831  | CLDN4                    | Affected   | 0.926  |                                 |            |        |
| GDF15      | Affected                | 0.823  | FYN                      | Increased  | 0.889  |                                 |            |        |
| TGM2       | Increased               | 0.807  | ICAM1                    | Affected   | 0.866  |                                 |            |        |
| MUC1       | Increased               | 0.797  | CYP1B1                   | Affected   | 0.831  |                                 |            |        |
| CRABP2     | Affected                | 0.794  | GDF15                    | Affected   | 0.823  |                                 |            |        |
| F2R        | Increased               | 0.769  | TGM2                     | Increased  | 0.807  |                                 |            |        |
| TACSTD2    | Increased               | 0.721  | MUC1                     | Increased  | 0.797  |                                 |            |        |
| DAPK1      | Decreased               | 0.698  | CRABP2                   | Affected   | 0.794  |                                 |            |        |
| PLD1       | Increased               | 0.687  | F2R                      | Increased  | 0.769  |                                 |            |        |
| CDKN1A     | Decreased               | 0.679  | TACSTD2                  | Increased  | 0.721  |                                 |            |        |
| SLPI       | Affected                | 0.678  | DAPK1                    | Decreased  | 0.698  |                                 |            |        |
| IFITM3     | Increased               | 0.604  | PLD1                     | Increased  | 0.687  |                                 |            |        |
| NOTCH1     | Increased               | 0.579  | CDKN1A                   | Decreased  | 0.679  |                                 |            |        |
| SERPINB2   | Decreased               | 0.577  | SLPI                     | Affected   | 0.678  |                                 |            |        |
| CD24       | Increased               | 0.571  | IFITM2                   | Affected   | 0.614  |                                 |            |        |
| ZFP36      | Affected                | 0.555  | IFITM3                   | Increased  | 0.604  |                                 |            |        |
| L1CAM      | Increased               | 0.55   | NOTCH1                   | Increased  | 0.579  |                                 |            |        |
| PSCA       | Increased               | 0.547  | SERPINB2                 | Decreased  | 0.577  |                                 |            |        |
| SOCS3      | Increased               | 0.536  | CD24                     | Increased  | 0.571  |                                 |            |        |
| NTN4       | Increased               | 0.529  | ZFP36                    | Affected   | 0.555  |                                 |            |        |
| MEF2D      | Increased               | 0.529  | L1CAM                    | Increased  | 0.55   |                                 |            |        |
| GREB1      | Affected                | 0.518  | PSCA                     | Increased  | 0.547  |                                 |            |        |
| PIK3CD     | Decreased               | 0.516  | SOCS3                    | Increased  | 0.536  |                                 |            |        |
| CSF1R      | Affected                | 0.516  | NTN4                     | Increased  | 0.529  |                                 |            |        |
| LAMA3      | Affected                | 0.513  | MEF2D                    | Increased  | 0.529  |                                 |            |        |
| CSF1       | Increased               | 0.507  | GREB1                    | Affected   | 0.518  |                                 |            |        |
| PIK3R3     | Increased               | 0.506  | PIK3CD                   | Decreased  | 0.516  |                                 |            |        |
| ERBB3      | Increased               | 0.505  | CSF1R                    | Affected   | 0.516  |                                 |            |        |
| SYT12      | Affected                | -0.527 | LAMA3                    | Affected   | 0.513  |                                 |            |        |
| PPP2R2C    | Affected                | -0.535 | CSF1                     | Increased  | 0.507  |                                 |            |        |
| EPCAM      | Decreased               | -0.542 | PIK3R3                   | Increased  | 0.506  |                                 |            |        |

|         |           |        |         |           |        |
|---------|-----------|--------|---------|-----------|--------|
| IRS1    | Affected  | -0.582 | ERBB3   | Increased | 0.505  |
| HTRA1   | Affected  | -0.582 | SYT12   | Affected  | -0.527 |
| CA9     | Affected  | -0.585 | PPP2R2C | Affected  | -0.535 |
| FGFR2   | Increased | -0.601 | EPCAM   | Decreased | -0.542 |
| SULT1E1 | Affected  | -0.621 | IRS1    | Affected  | -0.582 |
| PTGS1   | Affected  | -0.73  | HTRA1   | Affected  | -0.582 |
| IGFBP2  | Decreased | -0.751 | CA9     | Affected  | -0.585 |
| RAB31   | Affected  | -0.905 | FGFR2   | Increased | -0.601 |
| AKR1C2  | Affected  | -1.066 | SULT1E1 | Affected  | -0.621 |
|         |           |        | PTGS1   | Affected  | -0.73  |
|         |           |        | IGFBP2  | Decreased | -0.751 |
|         |           |        | RAB31   | Affected  | -0.905 |
|         |           |        | AKR1C2  | Affected  | -1.066 |

| Homing of cells |            |        | Invasion of cells |            |        | Chemotaxis |            |        |
|-----------------|------------|--------|-------------------|------------|--------|------------|------------|--------|
| Molecule        | Prediction | Log2FC | Molecule          | Prediction | Log2FC | Molecule   | Prediction | Log2FC |
| LCP1            | Increased  | 1.897  | MCAM              | Increased  | 2.07   | LCP1       | Increased  | 1.897  |
| IGFBP3          | Increased  | 1.669  | EYA2              | Increased  | 2.066  | LPAR3      | Increased  | 1.271  |
| LPAR3           | Increased  | 1.271  | DCN               | Decreased  | 1.983  | IL1B       | Increased  | 1.224  |
| IL1B            | Increased  | 1.224  | LCP1              | Increased  | 1.897  | FN1        | Increased  | 1.152  |
| FN1             | Increased  | 1.152  | AZGP1             | Decreased  | 1.644  | CCL28      | Increased  | 1.025  |
| CCL28           | Increased  | 1.025  | TNC               | Increased  | 1.418  | SAA1       | Affected   | 0.992  |
| SAA1            | Affected   | 0.992  | CFH               | Increased  | 1.412  | S100A8     | Increased  | 0.968  |
| S100A8          | Increased  | 0.968  | ELF3              | Increased  | 1.337  | SERPINA1   | Increased  | 0.949  |
| SERPINA1        | Increased  | 0.949  | DPYSL3            | Decreased  | 1.3    | FYN        | Increased  | 0.889  |
| FYN             | Increased  | 0.889  | IL1B              | Increased  | 1.224  | S100A7     | Increased  | 0.889  |
| S100A7          | Increased  | 0.889  | UBE2L6            | Increased  | 1.217  | ICAM1      | Increased  | 0.866  |
| ICAM1           | Increased  | 0.866  | AKT3              | Increased  | 1.159  | MUC1       | Increased  | 0.797  |
| MUC1            | Increased  | 0.797  | FN1               | Increased  | 1.152  | F2R        | Increased  | 0.769  |
| F2R             | Increased  | 0.769  | CEACAM6           | Increased  | 1.109  | MARCO      | Affected   | 0.712  |
| MARCO           | Affected   | 0.712  | CLCA2             | Decreased  | 0.992  | PLD1       | Increased  | 0.687  |
| PLD1            | Increased  | 0.687  | SAA1              | Increased  | 0.992  | LEF1       | Affected   | 0.68   |
| LEF1            | Affected   | 0.68   | S100A8            | Increased  | 0.968  | CDKN1A     | Affected   | 0.679  |
| CDKN1A          | Affected   | 0.679  | SERPINA1          | Increased  | 0.949  | SLPI       | Increased  | 0.678  |
| SLPI            | Increased  | 0.678  | CLDN4             | Affected   | 0.926  | LIF        | Increased  | 0.667  |
| LIF             | Increased  | 0.667  | FAP               | Increased  | 0.908  | S1PR3      | Increased  | 0.664  |
| S1PR3           | Increased  | 0.664  | FYN               | Increased  | 0.889  | INPP5D     | Increased  | 0.647  |
| INPP5D          | Increased  | 0.647  | S100A7            | Increased  | 0.889  | S100A9     | Increased  | 0.62   |
| S100A9          | Increased  | 0.62   | ATP6V0A4          | Increased  | 0.863  | NINJ1      | Affected   | 0.616  |
| NINJ1           | Affected   | 0.616  | CYP1B1            | Increased  | 0.831  | GSN        | Increased  | 0.573  |
| GSN             | Increased  | 0.573  | GDF15             | Increased  | 0.823  | L1CAM      | Affected   | 0.55   |
| L1CAM           | Increased  | 0.55   | WISP2             | Decreased  | 0.822  | CXADR      | Affected   | 0.549  |
| CXADR           | Affected   | 0.549  | MUC1              | Increased  | 0.797  | TYMP       | Affected   | 0.542  |
| TYMP            | Affected   | 0.542  | F2R               | Increased  | 0.769  | SOCS3      | Decreased  | 0.536  |
| SOCS3           | Decreased  | 0.536  | BTG2              | Decreased  | 0.762  | PIK3CD     | Increased  | 0.516  |
| PIK3CD          | Increased  | 0.516  | CLDN7             | Increased  | 0.715  | CSF1R      | Increased  | 0.516  |
| CSF1R           | Increased  | 0.516  | PLD1              | Affected   | 0.687  | GRN        | Decreased  | 0.507  |
| GRN             | Decreased  | 0.507  | LEF1              | Increased  | 0.68   | CSF1       | Increased  | 0.507  |

|        |           |       |         |           |       |        |           |        |
|--------|-----------|-------|---------|-----------|-------|--------|-----------|--------|
| CSF1   | Increased | 0.507 | CDKN1A  | Increased | 0.679 | ERBB3  | Increased | 0.505  |
| ERBB3  | Increased | 0.505 | S1PR3   | Increased | 0.664 | EPHB2  | Increased | -0.586 |
| EPHB2  | Increased | -0.59 | MCF2    | Increased | 0.654 | SEMA3B | Decreased | -1.036 |
| SEMA3B | Decreased | -1.04 | SLFN5   | Decreased | 0.65  | GNAZ   | Decreased | -1.147 |
| GNAZ   | Decreased | -1.15 | CLDN1   | Affected  | 0.644 |        |           |        |
|        |           |       | IL32    | Increased | 0.644 |        |           |        |
|        |           |       | DYRK1B  | Decreased | 0.644 |        |           |        |
|        |           |       | IFIT2   | Decreased | 0.637 |        |           |        |
|        |           |       | S100A9  | Affected  | 0.62  |        |           |        |
|        |           |       | DUSP1   | Increased | 0.604 |        |           |        |
|        |           |       | IFITM3  | Affected  | 0.604 |        |           |        |
|        |           |       | TNFSF10 | Increased | 0.589 |        |           |        |
|        |           |       | NOTCH1  | Increased | 0.579 |        |           |        |
|        |           |       | GSN     | Increased | 0.573 |        |           |        |
|        |           |       | CD24    | Increased | 0.571 |        |           |        |
|        |           |       | ZFP36   | Decreased | 0.555 |        |           |        |
|        |           |       | L1CAM   | Increased | 0.55  |        |           |        |
|        |           |       | RALGDS  | Affected  | 0.549 |        |           |        |
|        |           |       | ITGB6   | Affected  | 0.535 |        |           |        |
|        |           |       | MEF2D   | Increased | 0.529 |        |           |        |
|        |           |       | ADAM21  | Increased | 0.523 |        |           |        |
|        |           |       | CYP2J2  | Increased | 0.516 |        |           |        |
|        |           |       | PIK3CD  | Increased | 0.516 |        |           |        |
|        |           |       | LAMA3   | Affected  | 0.513 |        |           |        |
|        |           |       | GRN     | Increased | 0.507 |        |           |        |
|        |           |       | CSF1    | Increased | 0.507 |        |           |        |
|        |           |       | PML     | Increased | 0.506 |        |           |        |
|        |           |       | ERBB3   | Increased | 0.505 |        |           |        |
|        |           |       | EREK    | Decreased | -0.51 |        |           |        |
|        |           |       | EPCAM   | Decreased | -0.54 |        |           |        |
|        |           |       | HTRA1   | Increased | -0.58 |        |           |        |
|        |           |       | CA9     | Decreased | -0.59 |        |           |        |
|        |           |       | EPHB2   | Decreased | -0.59 |        |           |        |
|        |           |       | FGFR2   | Increased | -0.6  |        |           |        |
|        |           |       | IGFBP2  | Decreased | -0.75 |        |           |        |
|        |           |       | PLA2G16 | Decreased | -0.89 |        |           |        |
|        |           |       | CDH4    | Increased | -1.12 |        |           |        |
|        |           |       | SPARC   | Decreased | -1.14 |        |           |        |

<sup>a</sup>Prediction based on measurement direction. IPA: Ingenuity Pathway Analysis, Log2FC: log2 fold change.

**Table S4.** *TP53* mutation frequency in *MCPH1*-altered and non-altered breast tumors

| Dataset                          | Samples | <i>TP53</i> mutation frequency | p-value <sup>a</sup> | OR  | 95% CI       |
|----------------------------------|---------|--------------------------------|----------------------|-----|--------------|
| Breast invasive carcinoma (TCGA) | n=963   | 297/963 (31%)                  |                      |     |              |
| <i>MCPH1</i> -altered            | n=54    | 31/54 (57%)                    |                      |     |              |
| Non-altered                      | n=909   | 266/909 (29%)                  | 0.000029             | 3.3 | 1.865–5.692  |
| Breast cancer (METABRIC)         | n=2051  | 741/2051 (36%)                 |                      |     |              |
| <i>MCPH1</i> -altered            | n=26    | 19/26 (73%)                    |                      |     |              |
| Non-altered                      | n=2025  | 722/2025 (36%)                 | 0.000127             | 4.9 | 2.049–11.708 |

<sup>a</sup>  $\chi^2$ -test, *MCPH1*-altered vs. non-altered. CI: confidence interval, OR: odds ratio
